# Supplementary material for: An environment friendly multifunctional ZnO/wood fiber composite for the treatment of wastewater mixed with emulsions and dye
Source: Royal Society of Chemistry journal article supplement (doi:10.1039/d3ew00821e), 2024-01-01
Supplement: d3ew00821e1.pdf [file d3ew00821e1.pdf]

# **Multifunctional ZnO/wood fiber composites with antibacterial emulsion separation and dye self-cleaning**

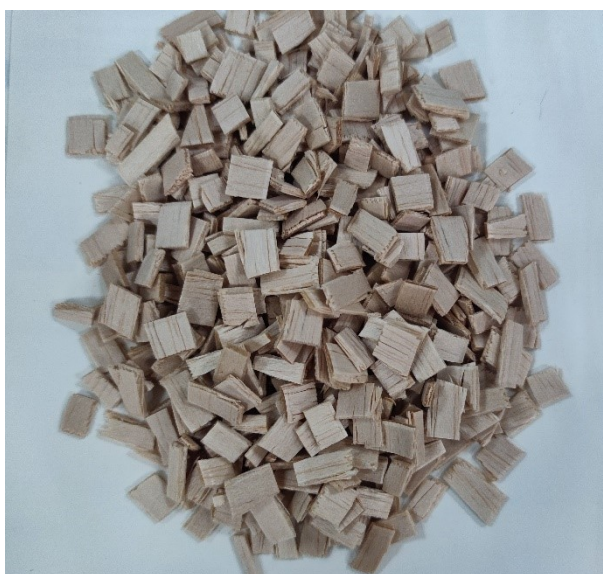

**Fig. S1** Balsa wood cut into pieces

kV: 20 放大倍率: 1000 取出 40 活时间(s): 129.8 时间常数( $\mu$ s): 3.84 分辨率:(eV) 129.6

## Sum Spectrum

EDS Spectrum: map202306201154113490.spc

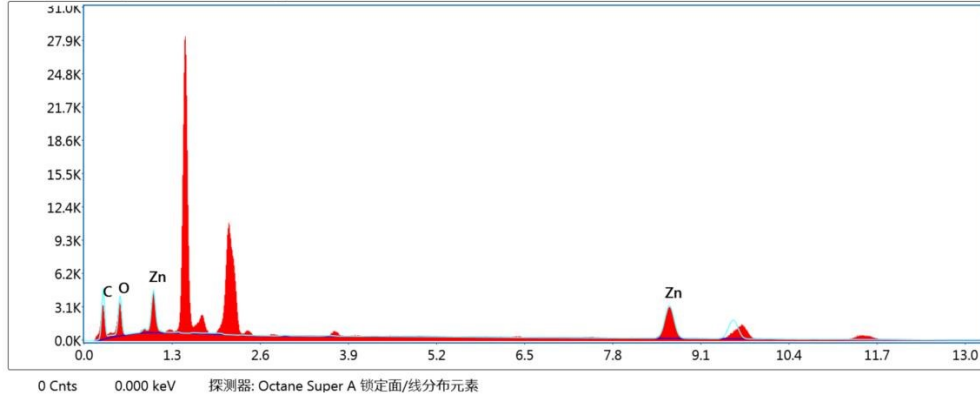

## 智能定量结果

| 元素  | 重量百分比 | 原子百分比 | 净强度    | 错误%  | Kratio | Z      | A      | F      |
|-----|-------|-------|--------|------|--------|--------|--------|--------|
| C K | 37.53 | 64.88 | 192.92 | 9.54 | 0.0948 | 1.1366 | 0.2222 | 1.0000 |
| O K | 15.58 | 20.22 | 173.52 | 9.75 | 0.0359 | 1.0920 | 0.2110 | 1.0000 |
| ZnK | 46.89 | 14.90 | 395.49 | 2.37 | 0.3892 | 0.8146 | 1.0093 | 1.0098 |

Fig. S2 General EDS energy spectrum of ZnO/WF

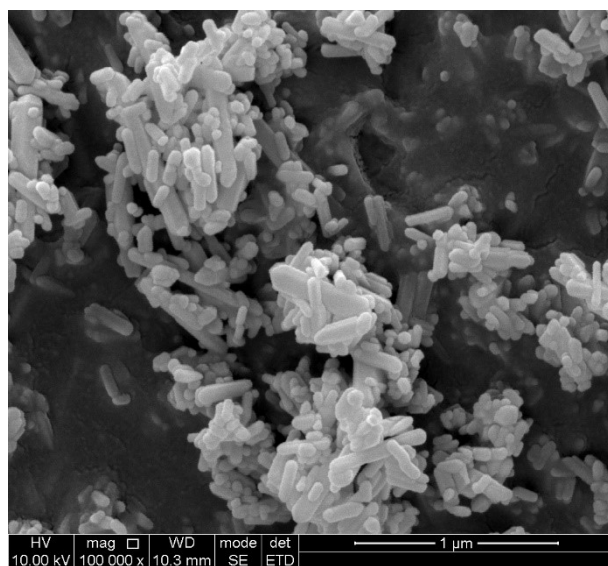

**Fig. S3** SEM of ZnO

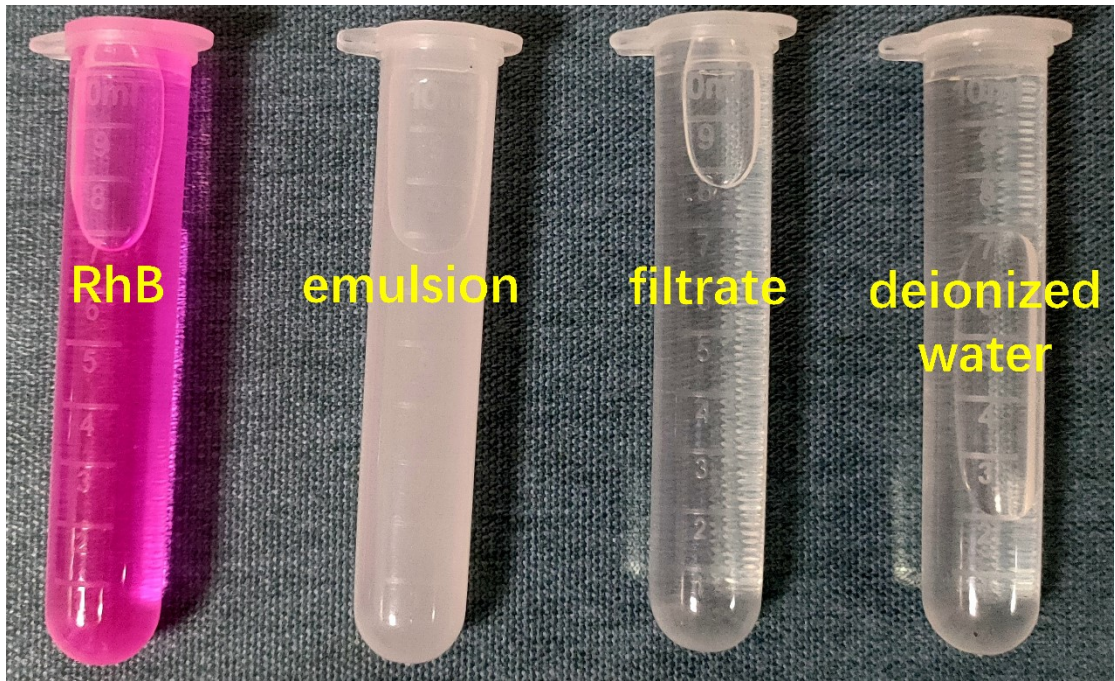

**Fig. S4** emulsion, RhB, filtrate, deionized water

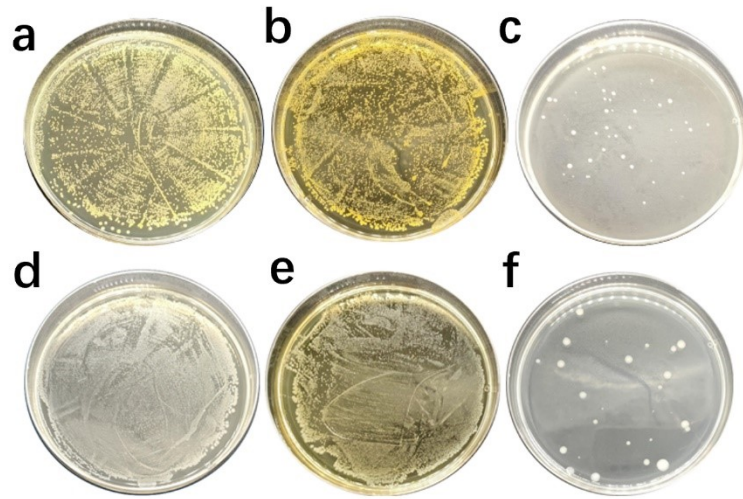

**Fig. S5** Antibacterial rates of samples co-cultured with bacteria for 24 h: (a) wood fibers with *S. aureus*; (b) ZnO/WF with *S. aureus*; (c) wood fibers with *E. coli*; (d) ZnO/WF with *E. coli*.
